# Supplementary material for: Structure-based design of a single-chain triple-disulfide-stabilized fusion-glycoprotein trimer that elicits high-titer neutralizing responses against human metapneumovirus
Source: PubMed Central journal article supplement (PMC10516418; doi:10.1371/journal.ppat.1011584), 2023-09-22
Supplement: ppat.1011584.s001.pdf [file ppat.1011584.s001.pdf]

**S1 Table. Engineered HMPV F glycoprotein variants.**

| Rationale                              | Name                 | Mutation                                        | F1-F2 Linker residues                         | Linker sequence |        |
|----------------------------------------|----------------------|-------------------------------------------------|-----------------------------------------------|-----------------|--------|
|                                        | v3B_G154C-R396C      | A140C, A147C, A249C, V84C, G154C, R396C, 185P   | 97-103                                        | GGGGGG          |        |
|                                        | v3B_GV154Cg-R396C    | A140C, A147C, A249C, V84C, GV154Cg, R396C, 185P | 97-103                                        | GGGGGG          |        |
|                                        | v3B_G154CG-R396C     | A140C, A147C, A249C, V84C, G154CG, R396C, 185P  | 97-103                                        | GGGGGG          |        |
|                                        | v3B_D454C-V458C      | A140C, A147C, A249C, V84C, D454C, V458C, 185P   | 97-103                                        | GGGGGG          |        |
|                                        | v3B_L141C-A161C      | A140C, A147C, A249C, V84C, L141C, A161C, 185P   | 97-103                                        | GGGGGG          |        |
|                                        | v3B_E26C-G439C       | A140C, A147C, A249C, V84C, E26C, G439C, 185P    | 97-103                                        | GGGGGG          |        |
| Additional DS                          | v3B_T45C-V157C       | A140C, A147C, A249C, V84C, T45C, V157C, 185P    | 97-103                                        | GGGGGG          |        |
|                                        | v3B_E51C-K166C       | A140C, A147C, A249C, V84C, E51C, K166C, 185P    | 97-103                                        | GGGGGG          |        |
|                                        | v3B_E80C-D224C       | A140C, A147C, A249C, V84C, E80C, D224C, 185P    | 97-103                                        | GGGGGG          |        |
|                                        | v3B_A86C-G212C       | A140C, A147C, A249C, V84C, A86C, G212C, 185P    | 97-103                                        | GGGGGG          |        |
|                                        | v3B_F103C-G366C      | A140C, A147C, A249C, V84C, F103C, G366C, 185P   | 97-103                                        | GGGGGG          |        |
|                                        | v3B_G106C-P321C      | A140C, A147C, A249C, V84C, G106C, P321C, 185P   | 97-103                                        | GGGGGG          |        |
|                                        | v3B_T365C-Q455C      | A140C, A147C, A249C, V84C, T365C, Q455C, 185P   | 97-103                                        | GGGGGG          |        |
|                                        | v3B_S293C-S443C      | A140C, A147C, A249C, V84C, S293C, S443C, 185P   | 97-103                                        | GGGGGG          |        |
|                                        |                      | v3B_Δ3                                          | A140C, A147C, A249C, V84C, 185P               | 89-112          | GGG    |
|                                        |                      | v3B_Δ15                                         | A140C, A147C, A249C, V84C, 185P               | 89-112          | GSG    |
|                                        | v3B_Δ12              | A140C, A147C, A249C, V84C, 185P                 | 89-112                                        | GSGGSG          |        |
|                                        | v3B_Δ9               | A140C, A147C, A249C, V84C, 185P                 | 89-112                                        | GSGGSGGSG       |        |
| Modify the F2-F1 link region           | v3B_Δ21              | A140C, A147C, A249C, V84C, 185P                 | 85-112                                        | MQSTPATGSGS     |        |
|                                        | v3B_+3               | A140C, A147C, A249C, V84C, 185P                 | 97-112                                        | GGGgsgGGG       |        |
|                                        | v3B_L3c              | A140C, A147C, A249C, V84C, 185P                 | 95-112                                        | LEVLFQGPgg      |        |
|                                        | v3B_Δ18              | A140C, A147C, A249C, V84C, 185P                 | 89-112                                        | MQSTPATNNGSGS   |        |
|                                        | v3B_L4c_Δ22          | A140C, A147C, A249C, V84C, 185P                 | 89-112                                        | MQLEVLFGQPgs    |        |
|                                        |                      | v3B_Δ12_Δ120C-Q426C                             | A140C, A147C, A249C, V84C, 185P, A120C, Q426C | 89-112          | GSGGSG |
|                                        |                      | v3B_Δ12_T119C-Q426C                             | A140C, A147C, A249C, V84C, 185P, T119C, Q426C | 89-112          | GSGGSG |
|                                        |                      | v3B_Δ12_G154C-R396C                             | A140C, A147C, A249C, V84C, 185P, G154C, R396C | 89-112          | GSGGSG |
|                                        | v3B_Δ12_G154gC-R396C | A140C, A147C, A249C, V84C, 185P, G154gC, R396C  | 89-112                                        | GSGGSG          |        |
|                                        | v3B_Δ12_G154Cg-R396C | A140C, A147C, A249C, V84C, 185P, G154Cg, R396C  | 89-112                                        | GSGGSG          |        |
| Extra IPDS to the v3B_Δ12              | v3B-Δ12_E26-G439     | A140C, A147C, A249C, V84C, 185P, E26C, G439C    | 89-112                                        | GSGGSG          |        |
|                                        | v3B-Δ12_G70-L375C    | A140C, A147C, A249C, V84C, 185P, G70C, L375C    | 89-112                                        | GSGGSG          |        |
|                                        | v3B-Δ12_G70gC-L375C  | A140C, A147C, A249C, V84C, 185P, G70GC, L375C   | 89-112                                        | GSGGSG          |        |
|                                        | v3B-Δ12_T365C-Q455C  | A140C, A147C, A249C, V84C, 185P, T365C, Q455C   | 89-112                                        | GSGGSG          |        |
|                                        | v3B-Δ12_D454C-V458C  | A140C, A147C, A249C, V84C, 185P, D454C, V458C   | 89-112                                        | GSGGSG          |        |
|                                        | v3B-Δ12_S293C-S443C  | A140C, A147C, A249C, V84C, 185P, S293C, S443C   | 89-112                                        | GSGGSG          |        |
|                                        | v3B-Δ12_D66C-R329C   | A140C, A147C, A249C, V84C, 185P, D66C, R329C    | 89-112                                        | GSGGSG          |        |
|                                        | v3B-Δ12_D66gc-R329   | A140C, A147C, A249C, V84C, 185P, D66GC, R329C   | 89-112                                        | GSGGSG          |        |
|                                        |                      | v3B_Δ12_K324E                                   | A140C, A147C, A249C, V84C, 185P, K324E        | 89-112          | GSGGSG |
|                                        |                      | v3B_Δ12_K324F                                   | A140C, A147C, A249C, V84C, 185P, K324F        | 89-112          | GSGGSG |
| Cav. charge-charge interaction v3B_Δ12 | v3B_Δ12_K324Q        | A140C, A147C, A249C, V84C, 185P, K324Q          | 89-112                                        | GSGGSG          |        |
|                                        | v3B_Δ12_V191I        | A140C, A147C, A249C, V84C, 185P, V191I          | 89-112                                        | GSGGSG          |        |
|                                        | v3B_Δ12_V191I, K324E | A140C, A147C, A249C, V84C, 185P, V191I, K324E   | 89-112                                        | GSGGSG          |        |

Continued on next page.

**S1 Table. Engineered RSV F glycoprotein variants, continued.**

| Rationale                       | Name                                  | Mutation                                                                         | F1-F2 Linker residues                                       | Linker sequence |        |
|---------------------------------|---------------------------------------|----------------------------------------------------------------------------------|-------------------------------------------------------------|-----------------|--------|
| Pro mutation                    | v3B_Δ12_K143P                         | A140C, A147C, A249C, V84C, 185P, K143P                                           | 89-112                                                      | GSGGSG          |        |
|                                 | v3B_Δ12_E131P                         | A140C, A147C, A249C, V84C, 185P, E131P                                           | 89-112                                                      | GSGGSG          |        |
|                                 | v3B_Δ12_N145P                         | A140C, A147C, A249C, V84C, 185P, N145P                                           | 89-112                                                      | GSGGSG          |        |
|                                 | v3B_Δ12_R163P                         | A140C, A147C, A249C, V84C, 185P, R163P                                           | 89-112                                                      | GSGGSG          |        |
|                                 | v3B_Δ12_E131P-R163P                   | A140C, A147C, A249C, V84C, 185P, E131P, R163P                                    | 89-112                                                      | GSGGSG          |        |
|                                 | v3B_Δ12_A459P                         | A140C, A147C, A249C, V84C, 185P, A459P                                           | 89-112                                                      | GSGGSG          |        |
|                                 | v3B_Δ12_E131P-K143P-N145P-R163P-A459P | A140C, A147C, A249C, V84C, 185P, E131P, K143P, N145P, R163P, A459P               | 89-112                                                      | GSGGSG          |        |
|                                 | v3B_Δ12_K143P-N145P-R163P-A459P       | A140C, A147C, A249C, V84C, 185P, N145P, R163P, A459P                             | 89-112                                                      | GSGGSG          |        |
|                                 | v3B_Δ12_K143P-N145P-R163P             | A140C, A147C, A249C, V84C, 185P, K143P, N145P, R163P                             | 89-112                                                      | GSGGSG          |        |
|                                 | v3B_Δ12_K143P-R163P                   | A140C, A147C, A249C, V84C, 185P, K143P, R163P                                    | 89-112                                                      | GSGGSG          |        |
|                                 | v3B_Δ12_K143P-R163P-E131P             | A140C, A147C, A249C, V84C, 185P, E131P, K143P, N145P, R163P, A459P               | 89-112                                                      | GSGGSG          |        |
|                                 | Combination of Pro muts               | v3B_Δ12_K143P-R163P-A459P                                                        | A140C, A147C, A249C, V84C, 185P, K143P, R163P, A459P        | 89-112          | GSGGSG |
|                                 |                                       | v3B_Δ12_K143P-R163P-N145P                                                        | A140C, A147C, A249C, V84C, 185P, N145P, R163P               | 89-112          | GSGGSG |
|                                 |                                       | v3B_Δ12_E131P-K143P-N145P-R163P                                                  | A140C, A147C, A249C, V84C, 185P, E131P, K143P, N145P, R163P | 89-112          | GSGGSG |
| v3B_Δ12_E131P-K143P-R163P-A459P |                                       | A140C, A147C, A249C, V84C, 185P, E131P, K143P, R163P, A459P                      | 89-112                                                      | GSGGSG          |        |
| v3B_Δ12_E131P-N145P-R163P-A459P |                                       | A140C, A147C, A249C, V84C, 185P, E131P, N145P, R163P, A459P                      | 89-112                                                      | GSGGSG          |        |
| v3B_Δ12_E131P-R163P-A459P       |                                       | A140C, A147C, A249C, V84C, 185P, E131P, R163P, A459P                             | 89-112                                                      | GSGGSG          |        |
| v3B_Δ12_E131P-R163P-N145P       |                                       | A140C, A147C, A249C, V84C, 185P, E131P, K143P, N145P, R163P, A459P               | 89-112                                                      | GSGGSG          |        |
| v3B_Δ12_R163P-A459P_D454C-V458C |                                       | A140C, A147C, A249C, V84C, 185P, R163P, A459P, D454C, V458C                      | 89-112                                                      | GSGGSG          |        |
| Combination of Pro muts with DS | v3B_Δ12_R163P-A459P_T365-Q455         | A140C, A147C, A249C, V84C, 185P, R163P, A459P, T365C, Q455C                      | 89-112                                                      | GSGGSG          |        |
|                                 | v3B_Δ12_E131P-R163P-A459P_D454C-V458C | A140C, A147C, A249C, V84C, 185P, E131P, R163P, A459P, D454C, V458C, T365C, Q455C | 89-112                                                      | GSGGSG          |        |
|                                 | v3B_Δ12_E131P-R163P-A459P_T365-Q455   | A140C, A147C, A249C, V84C, 185P, E131P, R163P, A459P, T365C, Q455C               | 89-112                                                      | GSGGSG          |        |
