# Supplementary material for: Structure-based design of a single-chain triple-disulfide-stabilized fusion-glycoprotein trimer that elicits high-titer neutralizing responses against human metapneumovirus
Source: PubMed Central journal article supplement (PMC10516418; doi:10.1371/journal.ppat.1011584), 2023-09-22
Supplement: ppat.1011584.s002.pdf [file ppat.1011584.s002.pdf]

**S2 Table. Binding affinity of HMPV designs with additional disulfide bonds and proline substitutions.**

| Sample                           | MPF5            |                                              |                                            | MPE33           |                                              |                                            | MPE8            |                                              |                                            |
|----------------------------------|-----------------|----------------------------------------------|--------------------------------------------|-----------------|----------------------------------------------|--------------------------------------------|-----------------|----------------------------------------------|--------------------------------------------|
|                                  | $K_D$ (nM)      | $k_{on}$ ( $M^{-1}s^{-1}$ )<br>$\times 10^5$ | $k_{off}$ ( $s^{-1}$ )<br>$\times 10^{-4}$ | $K_D$ (nM)      | $k_{on}$ ( $M^{-1}s^{-1}$ )<br>$\times 10^5$ | $k_{off}$ ( $s^{-1}$ )<br>$\times 10^{-4}$ | $K_D$ (nM)      | $k_{on}$ ( $M^{-1}s^{-1}$ )<br>$\times 10^5$ | $k_{off}$ ( $s^{-1}$ )<br>$\times 10^{-3}$ |
| HMPV_v3B $\Delta$ 12_D454C-V458C | 0.71 $\pm$ 0.01 | 1.71 $\pm$ 0.01                              | 4.22 $\pm$ 0.08                            | 3.37 $\pm$ 0.01 | 2.12 $\pm$ 0.01                              | 7.14 $\pm$ 0.01                            | 8.1 $\pm$ 0.1   | 2.25 $\pm$ 0.03                              | 1.82 $\pm$ 0.01                            |
| HMPV_v3B $\Delta$ 12_T365C-Q455C | 0.76 $\pm$ 0.07 | 3.67 $\pm$ 0.01                              | 2.78 $\pm$ 0.08                            | 2.86 $\pm$ 0.01 | 2.53 $\pm$ 0.01                              | 7.25 $\pm$ 0.01                            | 25.3 $\pm$ 0.3  | 1.63 $\pm$ 0.02                              | 4.13 $\pm$ 0.01                            |
| HMPV_v3B_D454C-V458C             | 0.57 $\pm$ 0.01 | 3.70 $\pm$ 0.50                              | 2.10 $\pm$ 0.3                             | 9.00 $\pm$ 0.30 | 1.53 $\pm$ 0.04                              | 13.8 $\pm$ 0.01                            | No binding      |                                              |                                            |
| HMPV_v3B_T365C-Q455C             | 0.60 $\pm$ 0.01 | 3.80 $\pm$ 0.50                              | 2.61 $\pm$ 0.3                             | 3.10 $\pm$ 0.30 | 2.5 $\pm$ 0.04                               | 8.10 $\pm$ 0.01                            | No binding      |                                              |                                            |
| HMPV_v3B $\Delta$ 12_K143P       | 1.08 $\pm$ 0.02 | 10.2 $\pm$ 0.01                              | 4.22 $\pm$ 0.08                            | 1.56 $\pm$ 0.04 | 8.88 $\pm$ 0.21                              | 13.9 $\pm$ 0.01                            | 5.16 $\pm$ 0.08 | 4.67 $\pm$ 0.07                              | 2.41 $\pm$ 0.01                            |
| HMPV_v3B $\Delta$ 12_E131P       | 0.35 $\pm$ 0.01 | 10.1 $\pm$ 0.12                              | 3.53 $\pm$ 0.05                            | 1.70 $\pm$ 0.03 | 5.55 $\pm$ 0.08                              | 9.45 $\pm$ 0.07                            | 5.56 $\pm$ 0.06 | 4.65 $\pm$ 0.04                              | 2.58 $\pm$ 0.01                            |
| HMPV_v3B $\Delta$ 12_N145P       | 0.50 $\pm$ 0.02 | 7.88 $\pm$ 0.02                              | 3.90 $\pm$ 0.12                            | 1.48 $\pm$ 0.02 | 5.06 $\pm$ 0.05                              | 7.50 $\pm$ 0.05                            | 6.85 $\pm$ 0.09 | 3.68 $\pm$ 0.05                              | 2.52 $\pm$ 0.01                            |
| HMPV_v3B $\Delta$ 12_R163P       | 0.76 $\pm$ 0.01 | 7.92 $\pm$ 0.01                              | 6.01 $\pm$ 0.05                            | 1.65 $\pm$ 0.03 | 5.50 $\pm$ 0.08                              | 9.05 $\pm$ 0.07                            | 5.96 $\pm$ 0.06 | 3.86 $\pm$ 0.04                              | 2.30 $\pm$ 0.01                            |
| HMPV_v3B $\Delta$ 12_E131P-R163P | 0.54 $\pm$ 0.01 | 8.04 $\pm$ 0.60                              | 4.33 $\pm$ 0.4                             | 1.82 $\pm$ 0.03 | 4.81 $\pm$ 0.07                              | 8.73 $\pm$ 0.07                            | 6.92 $\pm$ 0.13 | 3.68 $\pm$ 0.05                              | 2.54 $\pm$ 0.01                            |
| HMPV_v3B $\Delta$ 12_A459P       | 0.20 $\pm$ 0.01 | 8.98 $\pm$ 0.07                              | 1.83 $\pm$ 0.3                             | 1.34 $\pm$ 0.02 | 5.82 $\pm$ 0.06                              | 7.82 $\pm$ 0.05                            | 7.41 $\pm$ 0.12 | 3.61 $\pm$ 0.06                              | 2.67 $\pm$ 0.01                            |
| HMPV_v3Bv12_E131P-R163P-A459     | 0.77 $\pm$ 0.01 | 5.76 $\pm$ 0.60                              | 4.48 $\pm$ 0.4                             | 2.75 $\pm$ 0.03 | 3.47 $\pm$ 0.07                              | 9.55 $\pm$ 0.07                            | 6.95 $\pm$ 0.10 | 3.05 $\pm$ 0.01                              | 2.12 $\pm$ 0.01                            |
