# Supplementary material for: Structure-based design of a single-chain triple-disulfide-stabilized fusion-glycoprotein trimer that elicits high-titer neutralizing responses against human metapneumovirus
Source: PubMed Central journal article supplement (PMC10516418; doi:10.1371/journal.ppat.1011584), 2023-09-22
Supplement: ppat.1011584.s003.pdf [file ppat.1011584.s003.pdf]

**S3 Table. Cryo-EM data collection, refinement and validation statistics for HMPV F in complex with scFv MPE8.**

|                                                     | HMPV F in complex with<br>scFv MPE8<br>(EMD-28891)<br>(PDB ID: 8F6X) |
|-----------------------------------------------------|----------------------------------------------------------------------|
| <b>Data collection and processing</b>               |                                                                      |
| Magnification                                       | 105,000                                                              |
| Voltage (kV)                                        | 300                                                                  |
| Electron exposure (e <sup>-</sup> /Å <sup>2</sup> ) | 58.06                                                                |
| Defocus range (µm)                                  | -1.0 to -2.5 µm                                                      |
| Pixel size (Å)                                      | 0.83                                                                 |
| Symmetry imposed                                    | C3                                                                   |
| Final particle images (no.)                         | 192259                                                               |
| Map resolution (Å)                                  | 3.25                                                                 |
| FSC threshold                                       | 0.5                                                                  |
| <b>Refinement</b>                                   |                                                                      |
| Initial model used (PDB code)                       | 7LZE                                                                 |
| Model resolution (Å)                                | 3.23                                                                 |
| FSC threshold                                       | 0.5                                                                  |
| Map sharpening B factor (Å <sup>2</sup> )           | -152.1                                                               |
| Model composition                                   |                                                                      |
| Non-hydrogen atoms                                  | 14952                                                                |
| Protein residues                                    | 1980                                                                 |
| Ligands                                             | 3 NAG                                                                |
| B factors (Å <sup>2</sup> )(mean)                   |                                                                      |
| Protein                                             | 49.5                                                                 |
| Ligand                                              | 79.1                                                                 |
| R.m.s. deviations                                   |                                                                      |
| Bond lengths (Å)                                    | 0.002                                                                |
| Bond angles (°)                                     | 0.507                                                                |
| Validation                                          |                                                                      |
| MolProbity score                                    | 1.86                                                                 |
| Clash score                                         | 8.9                                                                  |
| Poor rotamers (%)                                   | 0.06                                                                 |
| Ramachandran plot                                   |                                                                      |
| Favored (%)                                         | 94.29                                                                |
| Allowed                                             | 5.66                                                                 |
| Disallowed                                          | 0.05                                                                 |
