# Supplementary material for: Structure-based design of a single-chain triple-disulfide-stabilized fusion-glycoprotein trimer that elicits high-titer neutralizing responses against human metapneumovirus
Source: PubMed Central journal article supplement (PMC10516418; doi:10.1371/journal.ppat.1011584), 2023-09-22
Supplement: ppat.1011584.s004.pdf [file ppat.1011584.s004.pdf]

**S4 Table. Serum neutralization of HMPV subtype A2 and B2 strain.**

|                                   | NHP# | Initial dilution | Serial dilution | PRNT <sub>60</sub> | PRNT <sub>60</sub> (Log <sub>2</sub> ) | PRNT <sub>60</sub> | PRNT <sub>60</sub> (Log <sub>2</sub> ) |
|-----------------------------------|------|------------------|-----------------|--------------------|----------------------------------------|--------------------|----------------------------------------|
|                                   |      |                  |                 | HMPV A             | HMPV A                                 | HMPV B             | HMPV B                                 |
| Group1<br>prefusion<br>pre bleed  | 1    | 1:10             | 4               | 63                 | 6                                      | 14.2               | 3.8                                    |
|                                   | 2    | 1:10             | 4               | 15                 | 3.9                                    | <10                | <3.3                                   |
|                                   | 3    | 1:10             | 4               | 13                 | 3.7                                    | <10                | <3.3                                   |
|                                   | 4    | 1:10             | 4               | 29                 | 4.9                                    | 10.4               | 3.4                                    |
|                                   | 5    | 1:10             | 4               | 23                 | 4.5                                    | 10.5               | 3.4                                    |
| Group2<br>postfusion<br>pre bleed | 1    | 1:10             | 4               | 78                 | 6.3                                    | <10                | <3.3                                   |
|                                   | 2    | 1:10             | 4               | 15                 | 3.9                                    | <10                | <3.3                                   |
|                                   | 3    | 1:10             | 4               | 14                 | 3.8                                    | <10                | <3.3                                   |
|                                   | 4    | 1:10             | 4               | <10                | <3.3                                   | <10                | <3.3                                   |
|                                   | 5    | 1:10             | 4               | 14                 | 3.8                                    | <10                | <3.3                                   |
| Group1<br>prefusion<br>week 2     | 1    | 1:10             | 4               | 12648              | 13.6                                   | 1863.8             | 10.9                                   |
|                                   | 2    | 1:10             | 4               | 3121               | 11.6                                   | 2025.1             | 11.0                                   |
|                                   | 3    | 1:10             | 4               | 3518               | 11.8                                   | 3420               | 11.7                                   |
|                                   | 4    | 1:10             | 4               | 9252               | 13.2                                   | 8970.6             | 13.1                                   |
|                                   | 5    | 1:10             | 4               | 6848               | 12.7                                   | 1831.6             | 10.8                                   |
| Group2<br>postfusion<br>week 2    | 1    | 1:10             | 4               | 4538               | 12.1                                   | 2415.9             | 11.2                                   |
|                                   | 2    | 1:10             | 4               | 3925               | 11.9                                   | 1210.6             | 10.2                                   |
|                                   | 3    | 1:10             | 4               | 5514               | 12.4                                   | 1922.9             | 10.9                                   |
|                                   | 4    | 1:10             | 4               | 3108               | 11.6                                   | 556.8              | 9.1                                    |
|                                   | 5    | 1:10             | 4               | 7456               | 12.9                                   | 633.7              | 9.3                                    |
| Group1<br>prefusion<br>week 6     | 1    | 1:10             | 4               | 17500              | 14.1                                   | 2406.7             | 11.2                                   |
|                                   | 2    | 1:10             | 4               | 5629               | 12.5                                   | 2083.8             | 11.0                                   |
|                                   | 3    | 1:10             | 4               | 4804               | 12.2                                   | 2764               | 11.4                                   |
|                                   | 4    | 1:10             | 4               | 12278              | 13.6                                   | 8861.8             | 13.1                                   |
|                                   | 5    | 1:10             | 4               | 10993              | 13.4                                   | 2386.4             | 11.2                                   |
| Group2<br>postfusion<br>week 6    | 1    | 1:10             | 4               | 7920               | 13                                     | 1568               | 10.6                                   |
|                                   | 2    | 1:10             | 4               | 9544               | 13.2                                   | 1719.8             | 10.7                                   |
|                                   | 3    | 1:10             | 4               | 9614               | 13.2                                   | 1665.5             | 10.7                                   |
|                                   | 4    | 1:10             | 4               | 9835               | 13.3                                   | 1631.2             | 10.7                                   |
|                                   | 5    | 1:10             | 4               | 9040               | 13.2                                   | 2133.5             | 11.1                                   |
| Virus only                        |      |                  |                 |                    | <3.3                                   |                    | <3.3                                   |
| Negative control                  |      |                  |                 |                    | <3.3                                   |                    | <3.3                                   |
| Positive control                  |      |                  |                 | 1143               | 10.2                                   | 88                 | 6.5                                    |
